# Supplementary material for: Catalyst-free synthesis of 3,1-benzoxathiin-4-ones/1,3-benzodioxin-4-ones
Source: Royal Society of Chemistry journal article supplement (doi:10.1039/d0ob02543g), 2021-01-01

## HRMS spectra

for

### CATALYST FREE SYNTHESIS OF 1,3-BENZOXATHIINE-4-ONES / 1,3-BENZODIOXIN-4-ONES

Sengodagounder Muthusamy<sup>a,\*</sup> Muthukumar Malarvizhi<sup>a</sup> and Eringathodi Suresh<sup>b</sup>

<sup>a</sup>*School of Chemistry, Bharathidasan University, Trichirappalli-620 024, India*

<sup>b</sup>*Analytical Discipline and Centralized Instrumentation Facility, Central Salt & Marine  
Chemicals Research Institute, Bhavnagar-364 002, India*

\*Tel: +91-431-2407053; Fax: +91-431-2407045; E-mail: [muthu@bdu.ac.in](mailto:muthu@bdu.ac.in)

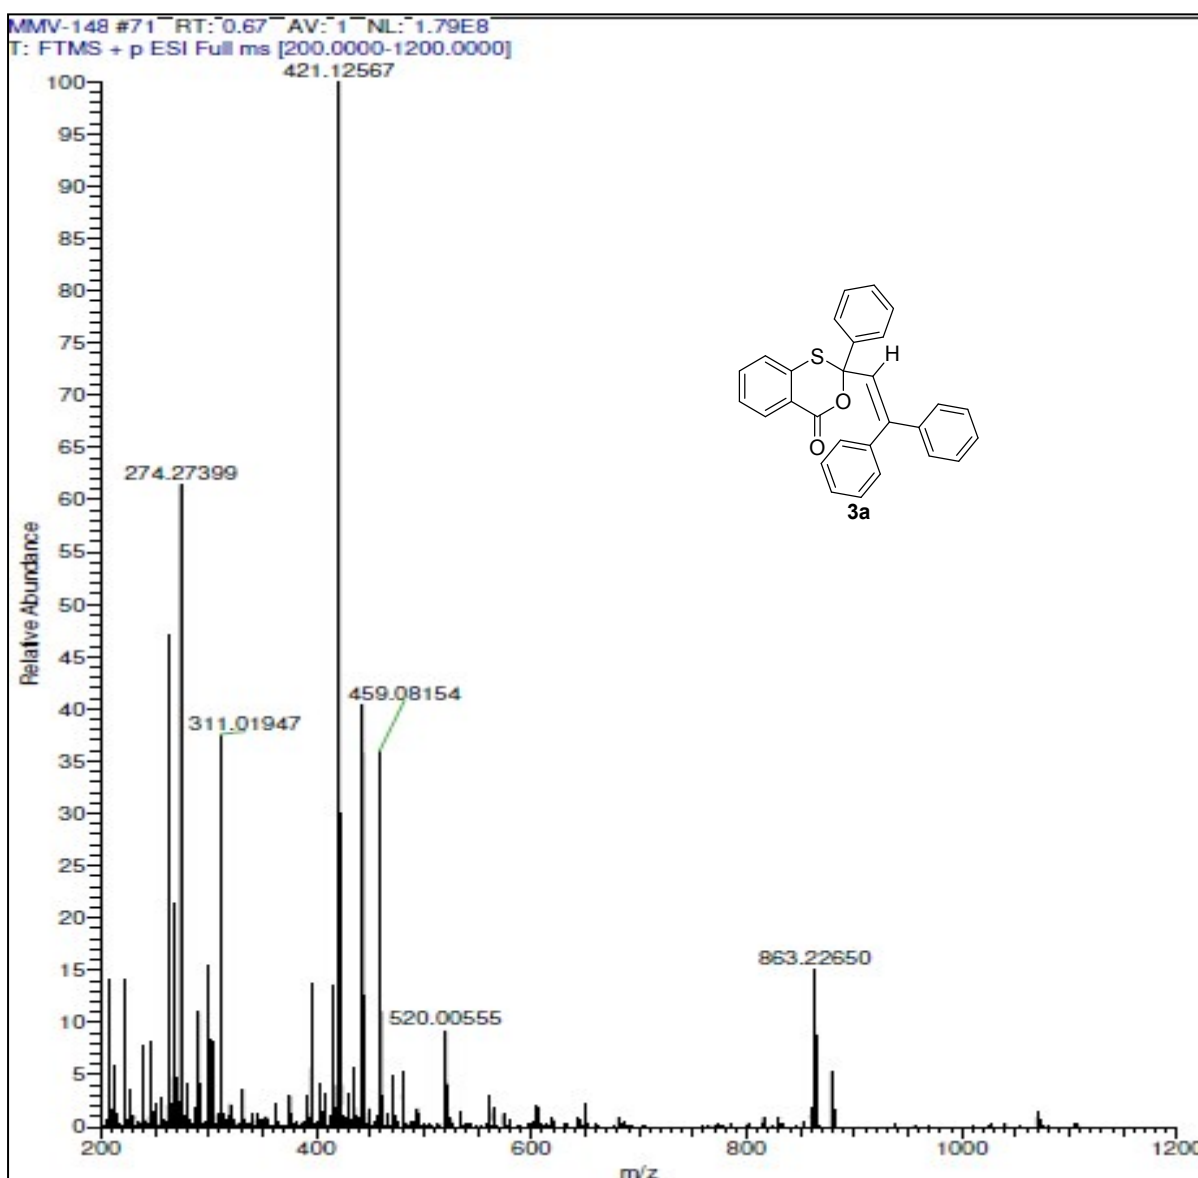

MMV-144\_171023124404 #67 RT: 0.63 AV: 1 NL: 5.69E8  
T: FTMS + p ESI Full ms [200.0000-1000.0000]

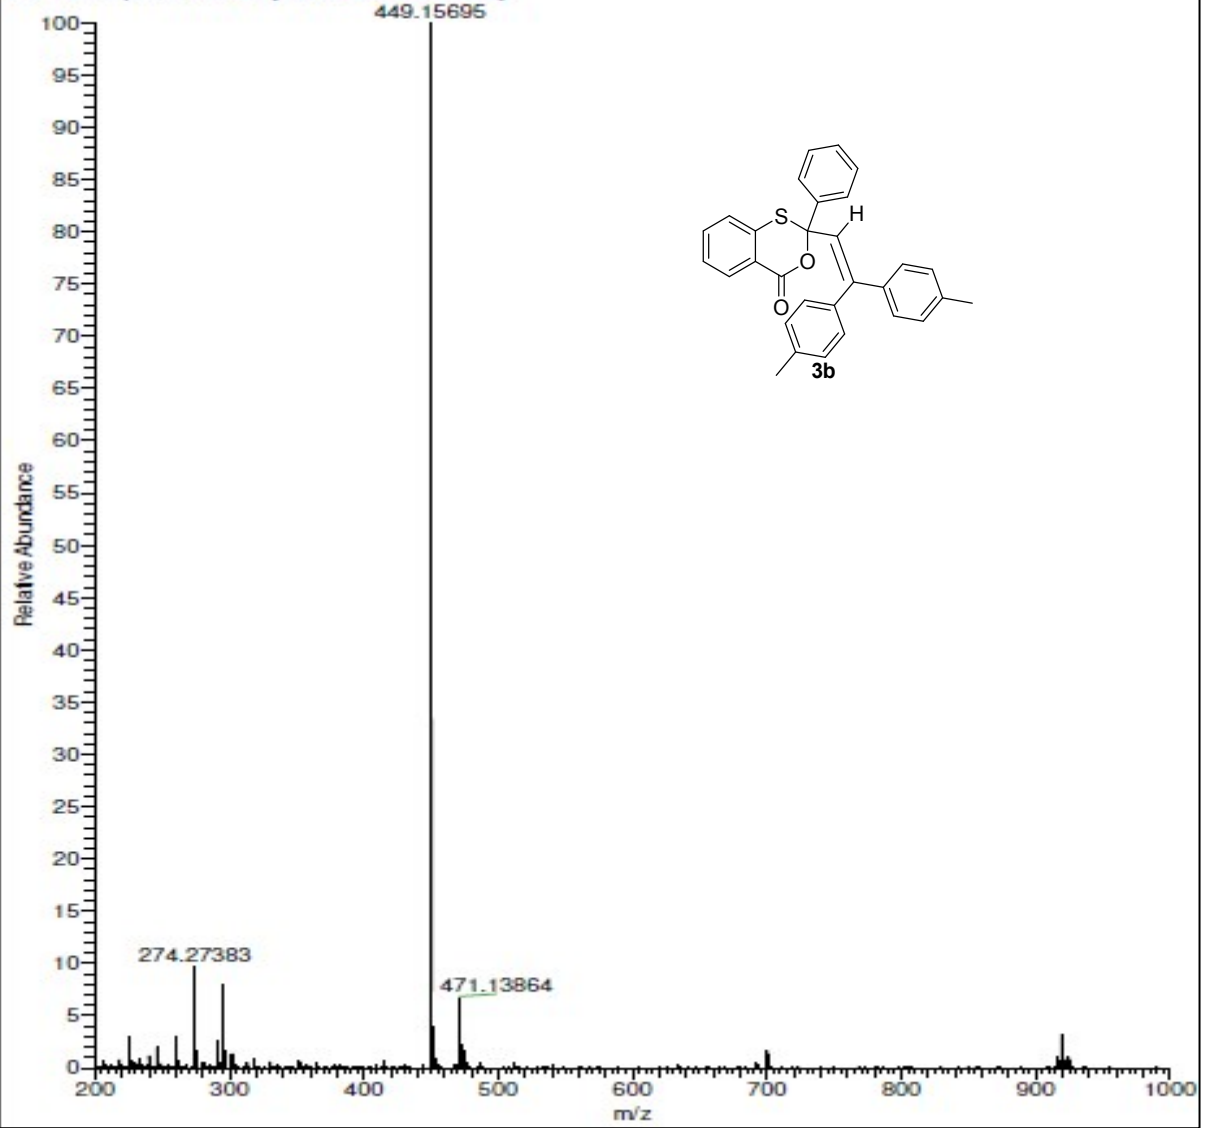

MMV-224\_20180409123313 #48 RT: 0.50 AV: 1 NL: 6.37E7  
T: FTMS + p ESI Full ms [200.0000-1000.0000]

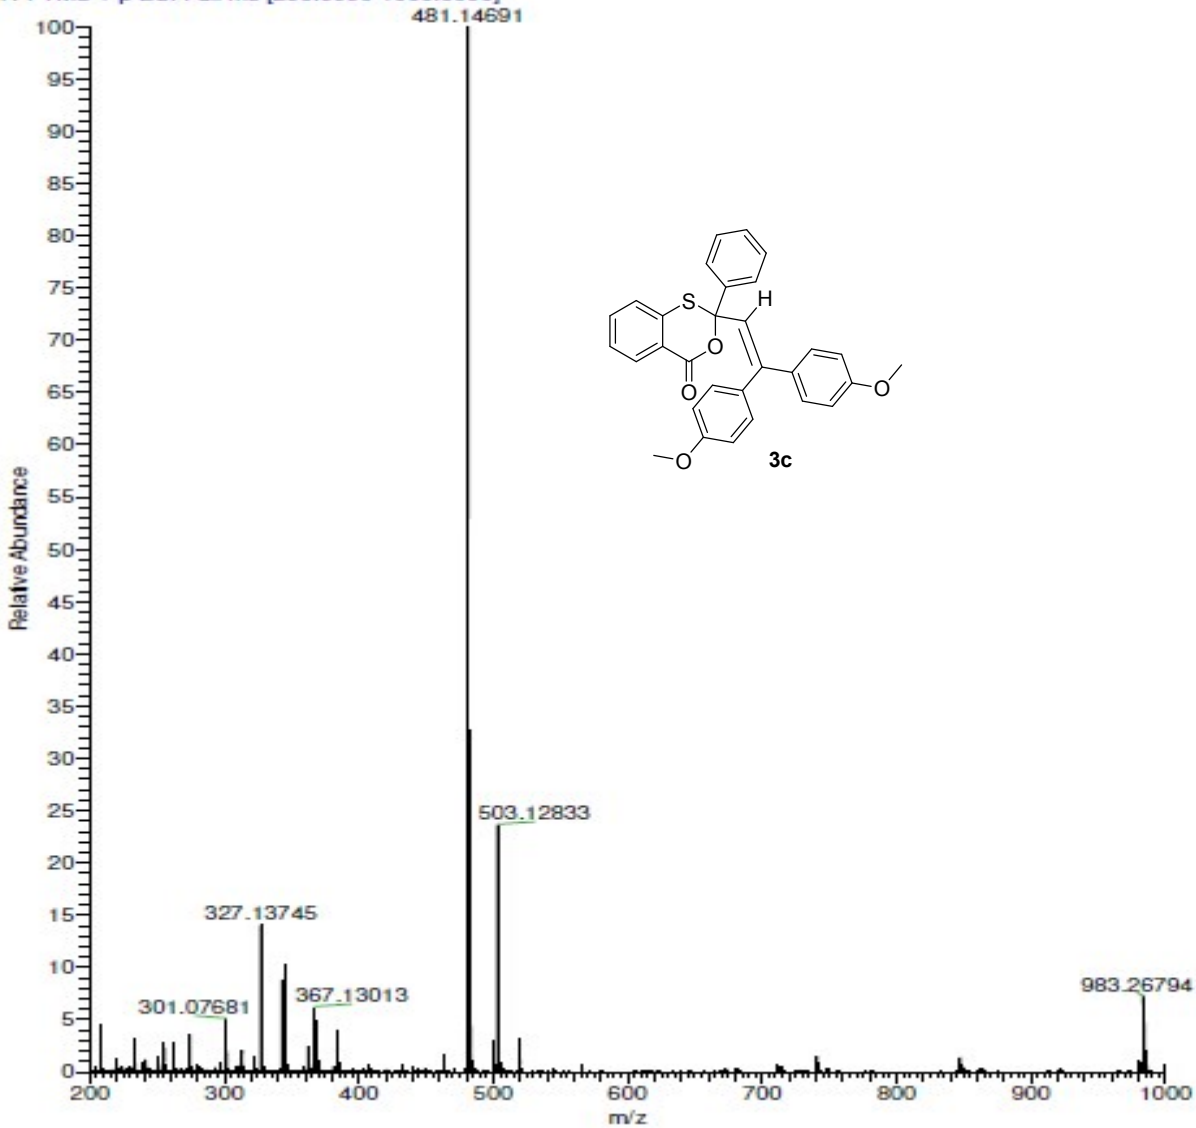

MMV-143 #17 RT: 0.16 AV: 1 NL: 1.07E8  
T: FTMS + p ESI Full ms [200.0000-1200.0000]

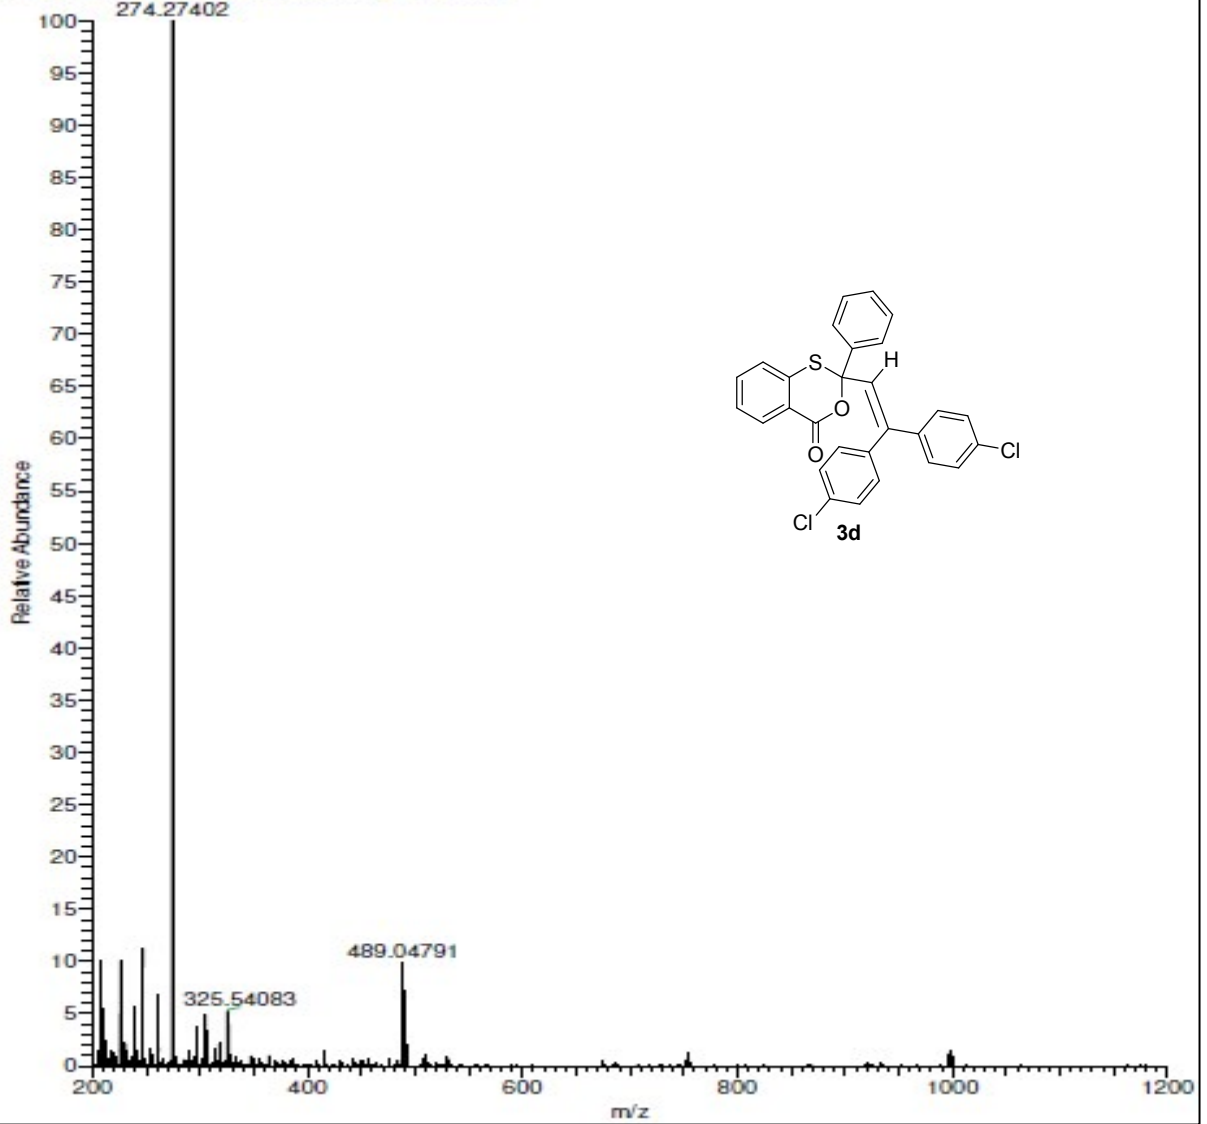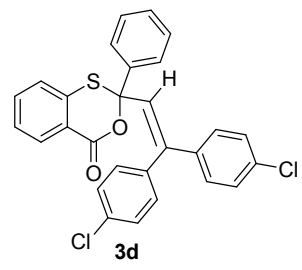

MMV-138 #27 RT: 0.25 AV: 1 NL: 1.70E8  
T: FTMS + p ESI Full ms [200.0000-1500.0000]

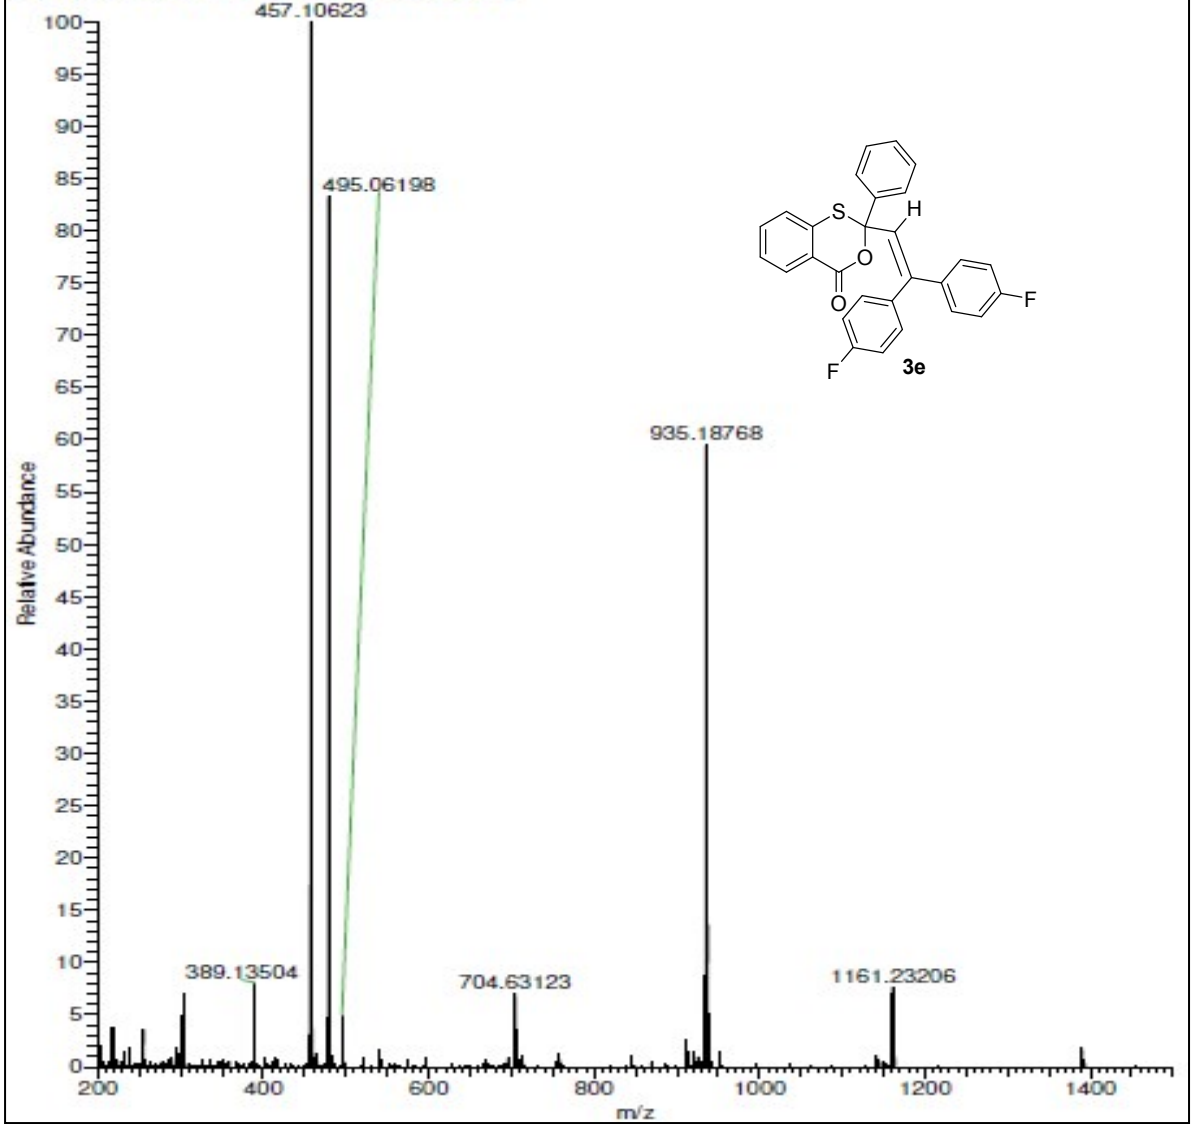

MMV-171-b #51 RT: 0.50 AV: 1 NL: 9.43E6  
T: FTMS + p ESI Full ms [100.0000-1000.0000]

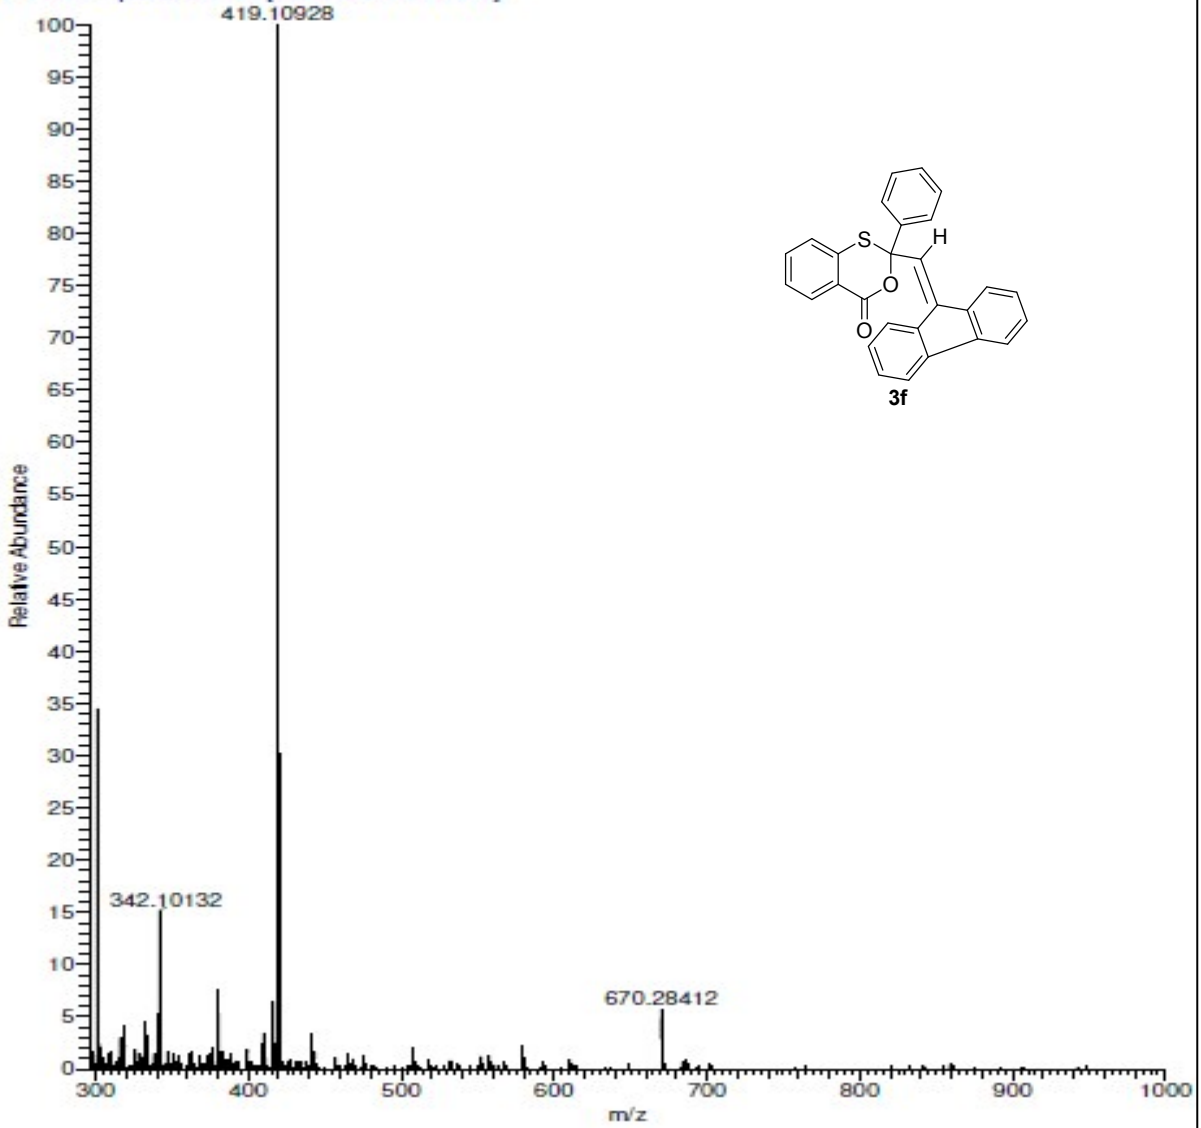

MMV-220 #71 RT: 0.71 AV: 1 NL: 6.45E7  
T: FTMS + p ESI Full ms [100.0000-1000.0000]

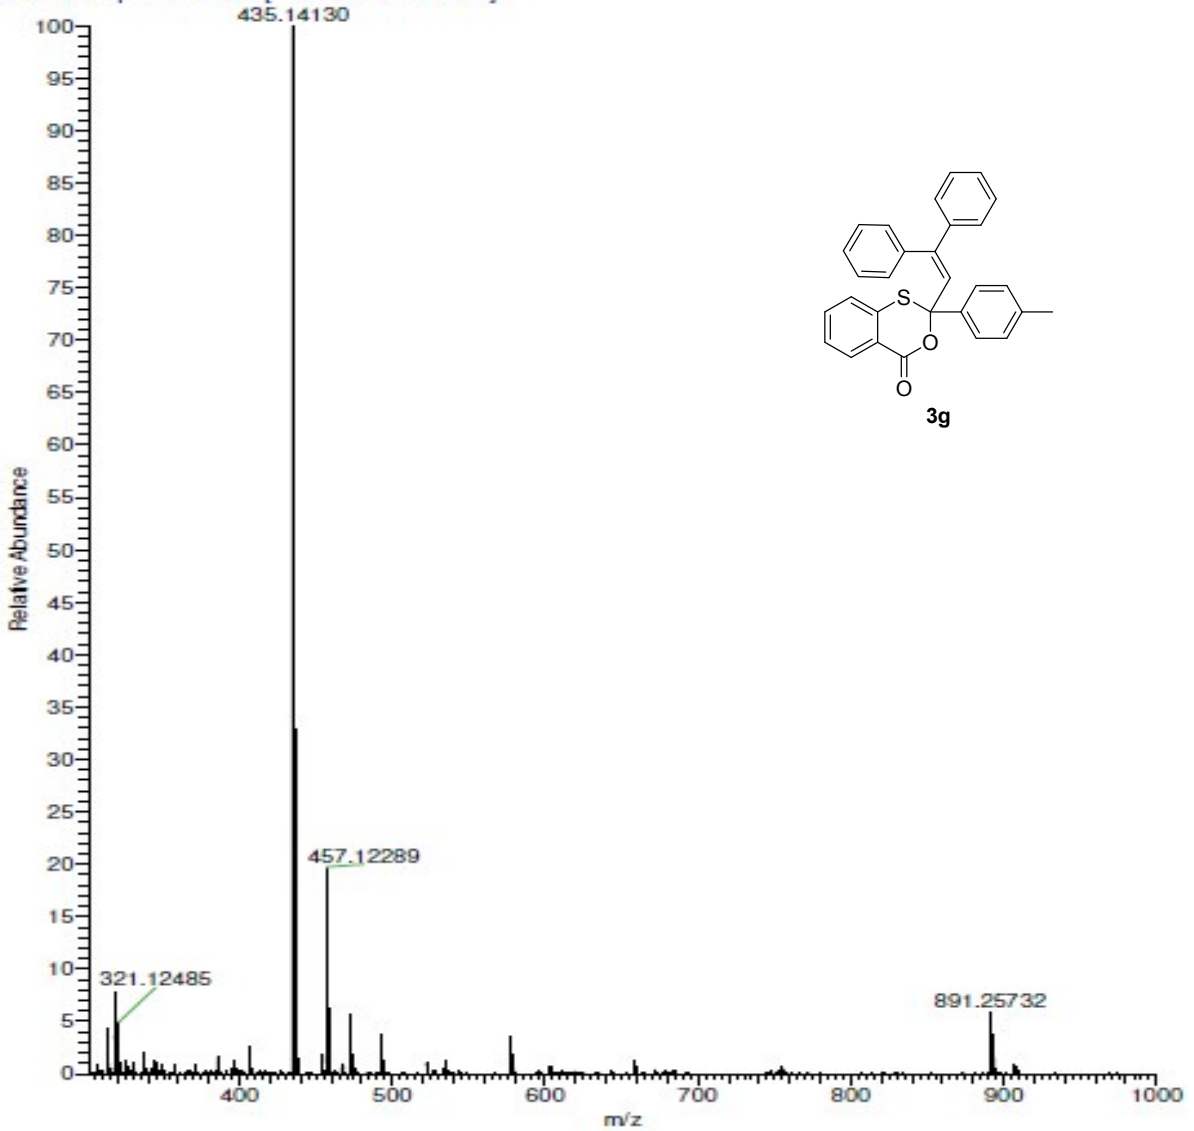

MMV-223 #41 RT: 0.42 AV: 1 NL: 3.07E8  
T: FTMS + p ESI Full ms [100.0000-1000.0000]

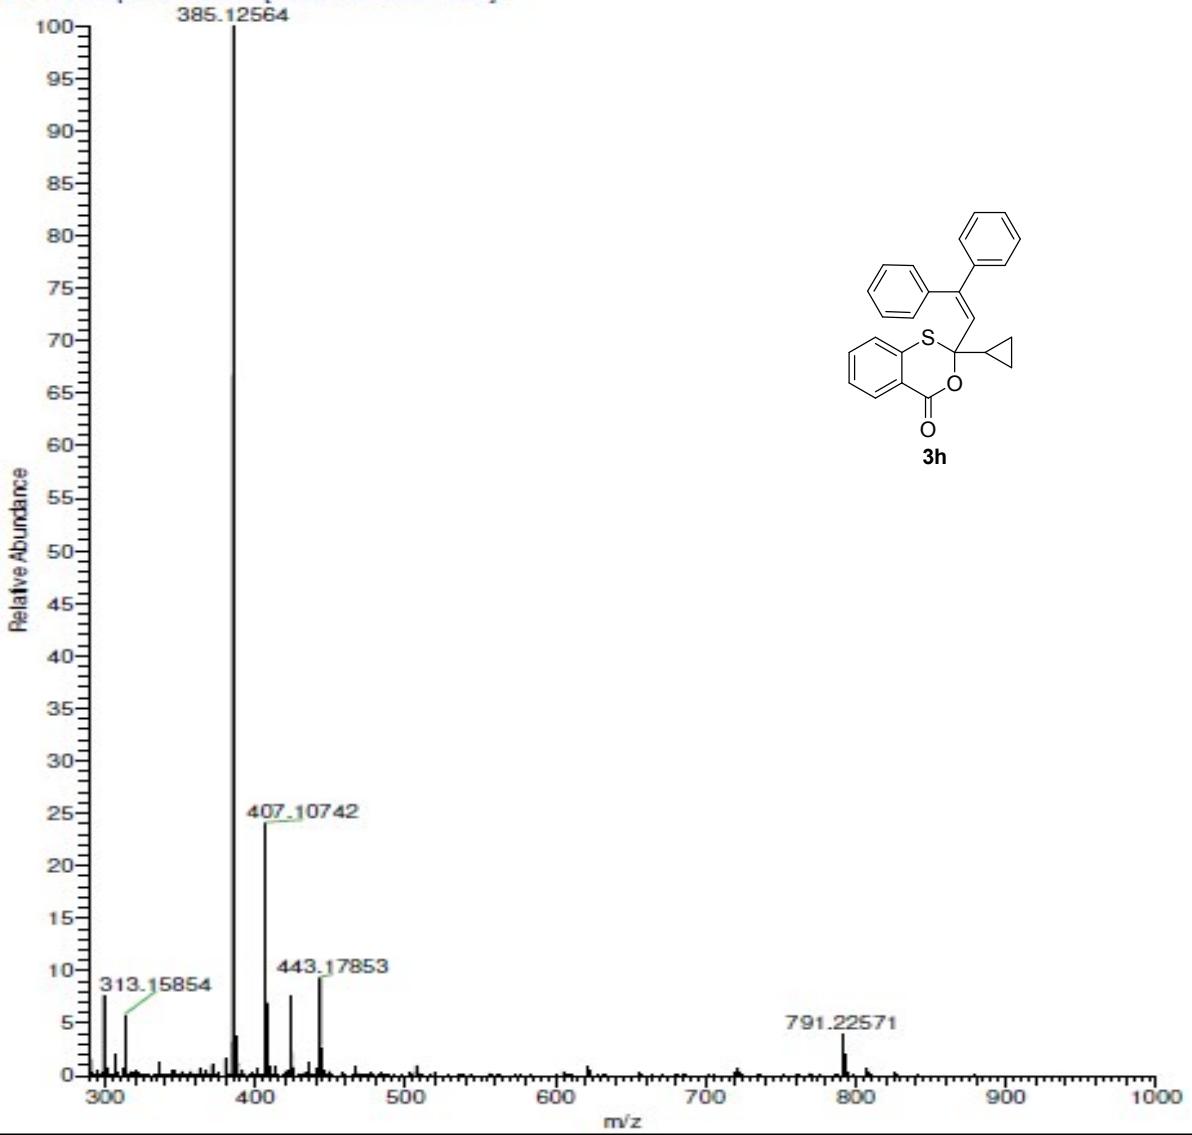



MMV-207 #85 RT: 0.85 AV: 1 NL: 9.72E6  
T: FTMS + p ESI Full ms [100.0000-1000.0000]

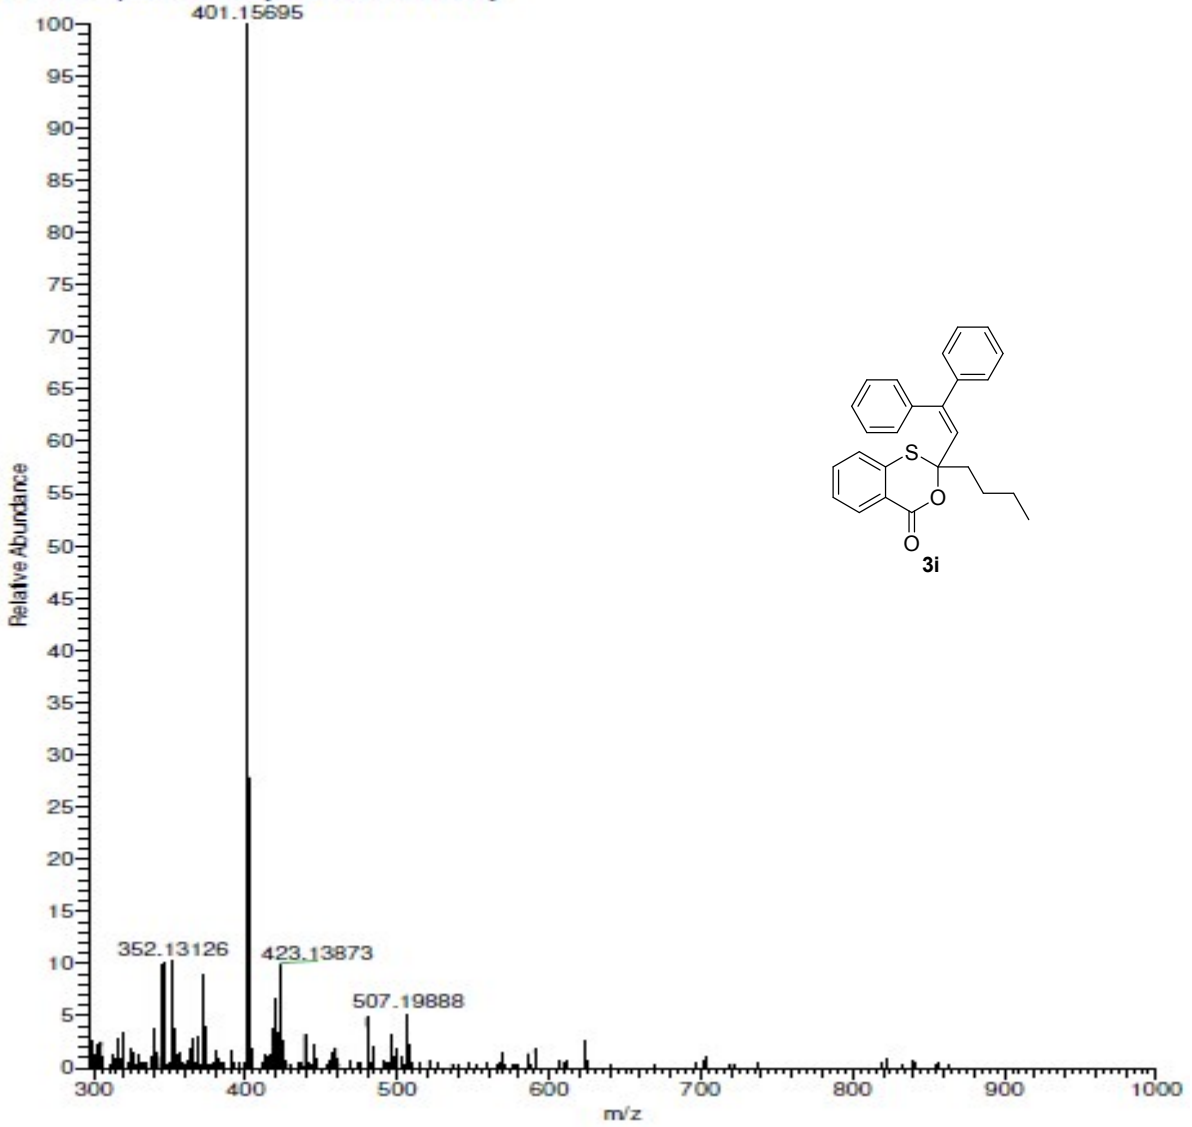

MMV-495 #77 RT: 0.78 AV: 1 NL: 1.79E7  
T: FTMS + p ESI Full ms [100.0000-1000.0000]

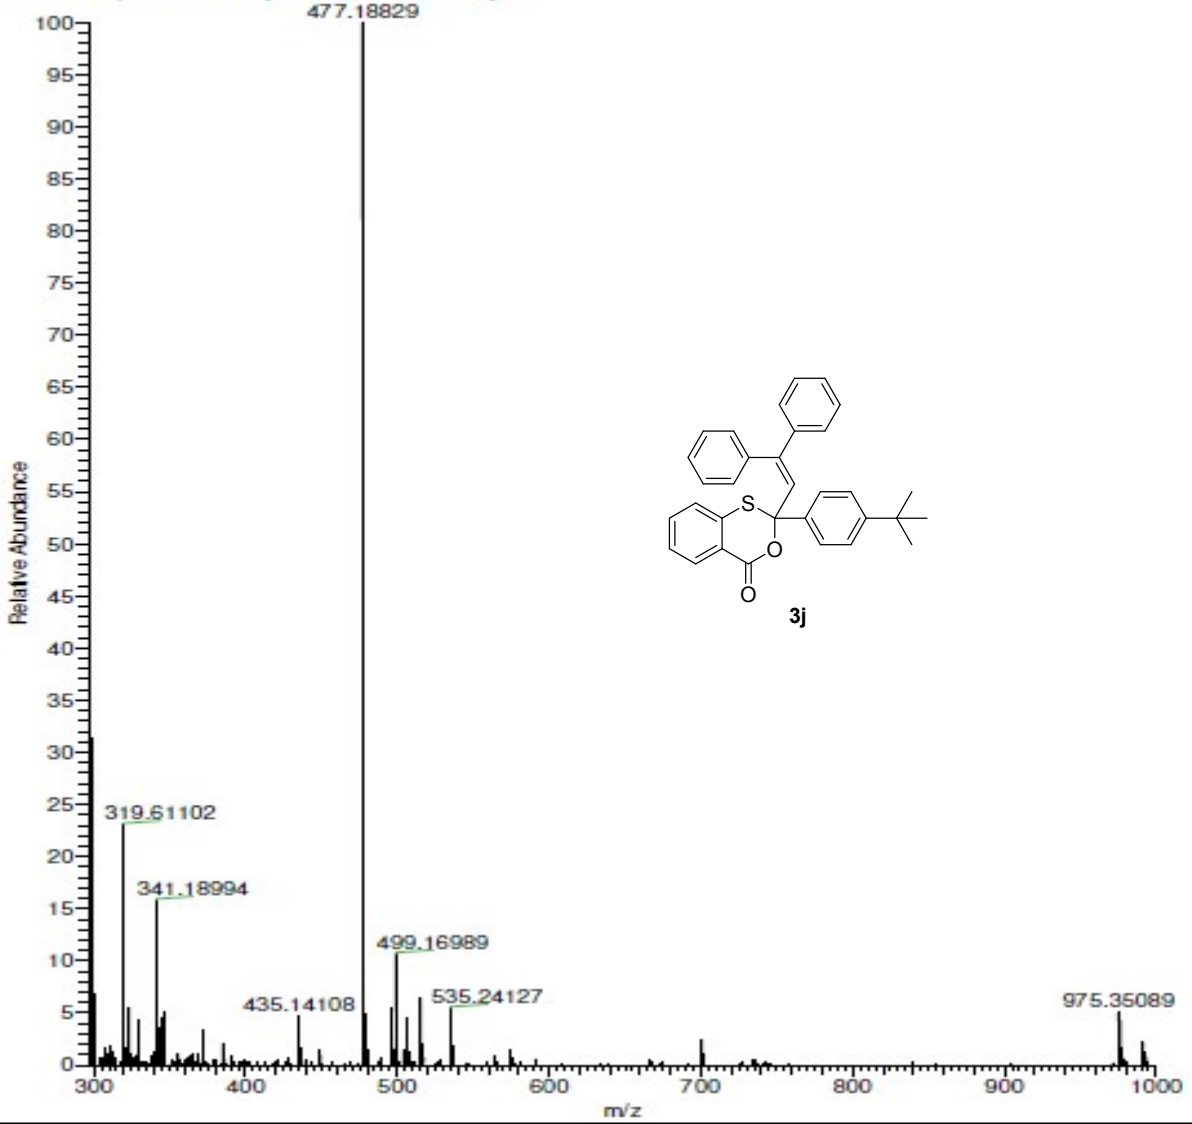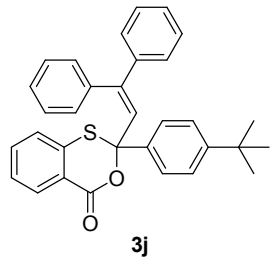

MMV-491 #95 RT: 0.95 AV: 1 NL: 3.30E7  
T: FTMS + p ESI Full ms [100.0000-1000.0000]

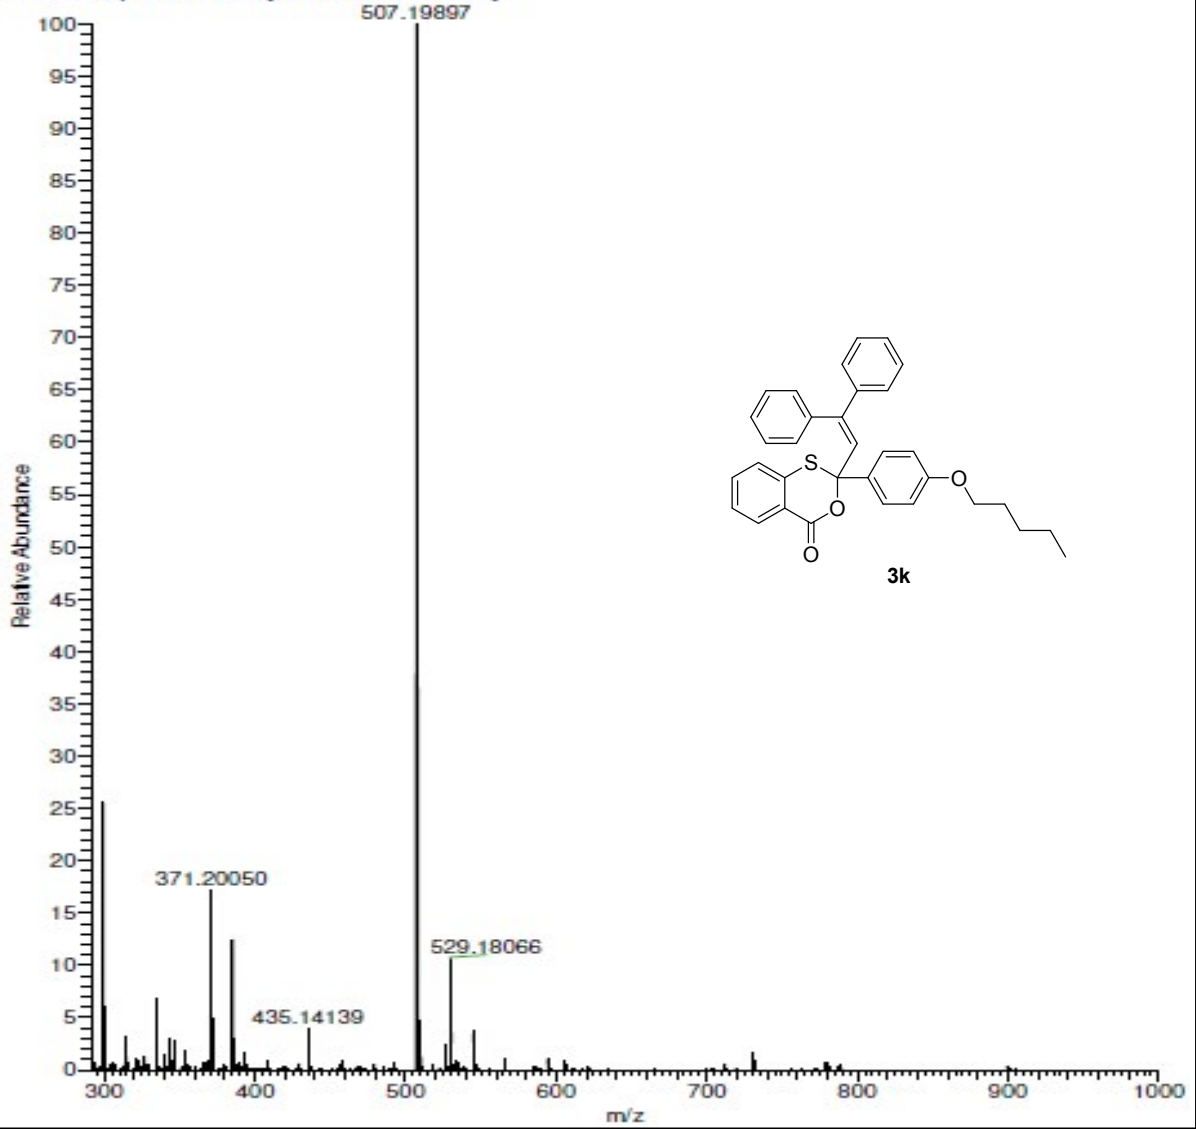

MMV-496\_20201015162258 #83 RT: 0.82 AV: 1 NL: 3.36E6  
T: FTMS + p ESI Full ms [100.0000-1000.0000]

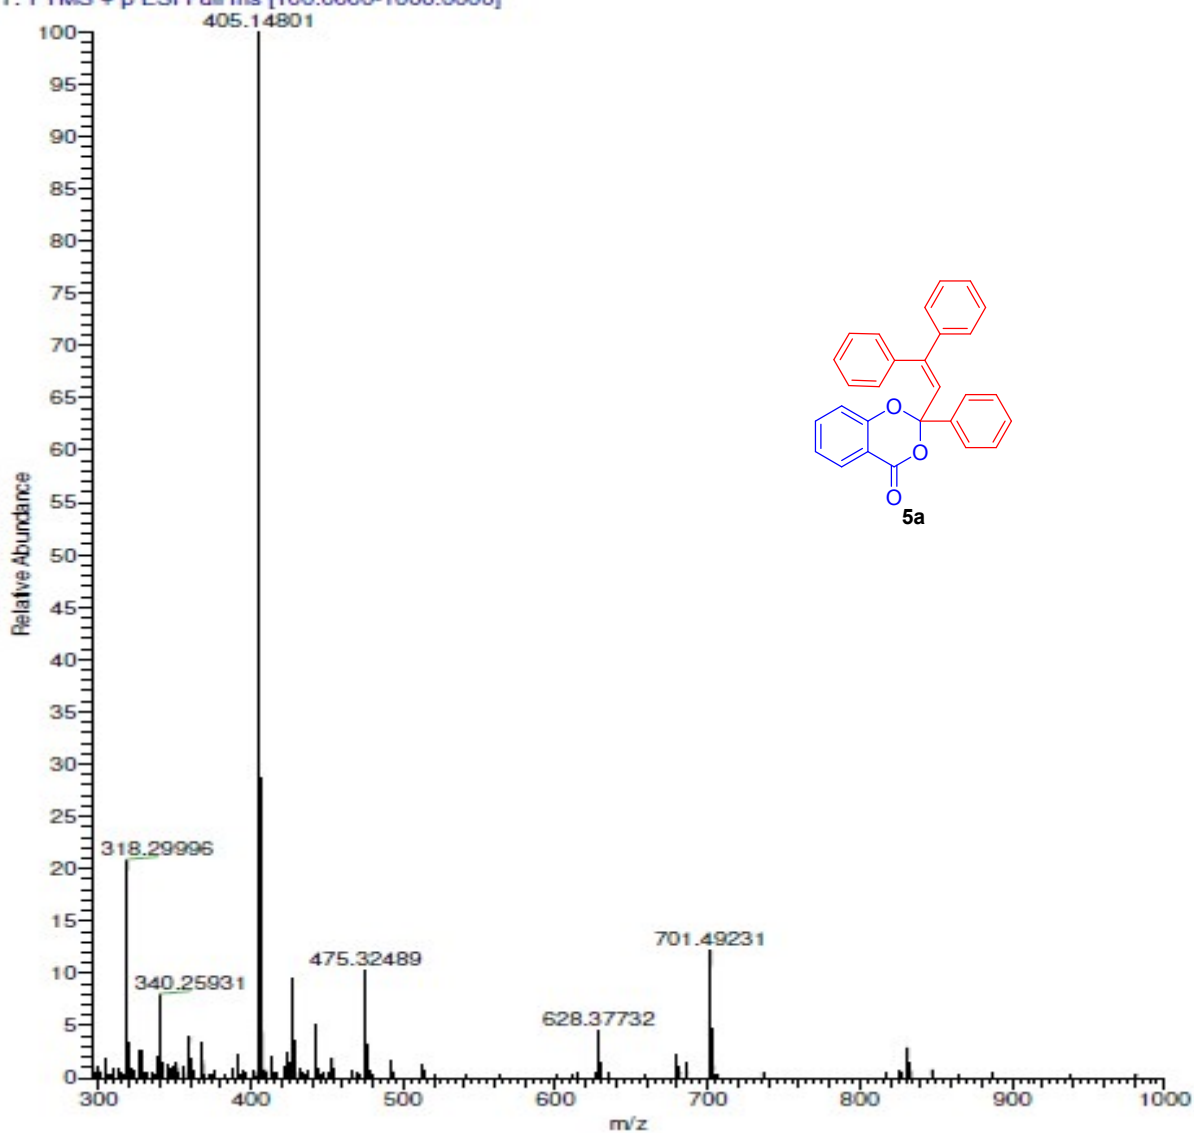

MMV-141 #49 RT: 0.50 AV: 1 NL: 4.30E7  
T: FTMS + p ESI Full ms [100.0000-1000.0000]

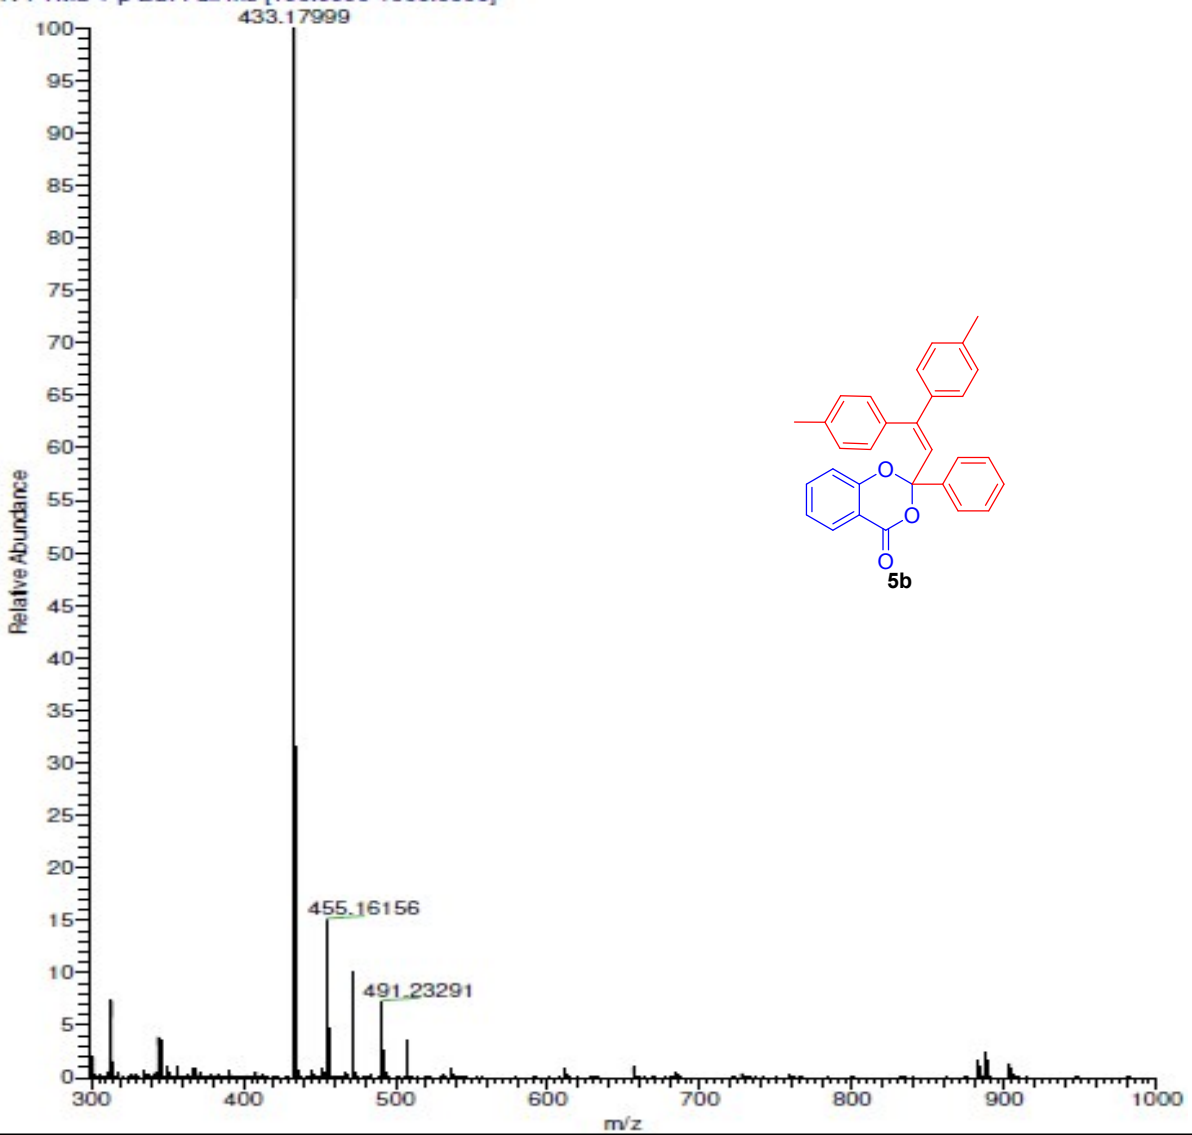

MMV-640-a #59 RT: 0.59 AV: 1 NL: 7.84E6  
T: FTMS + p ESI Full ms [100.0000-1000.0000]

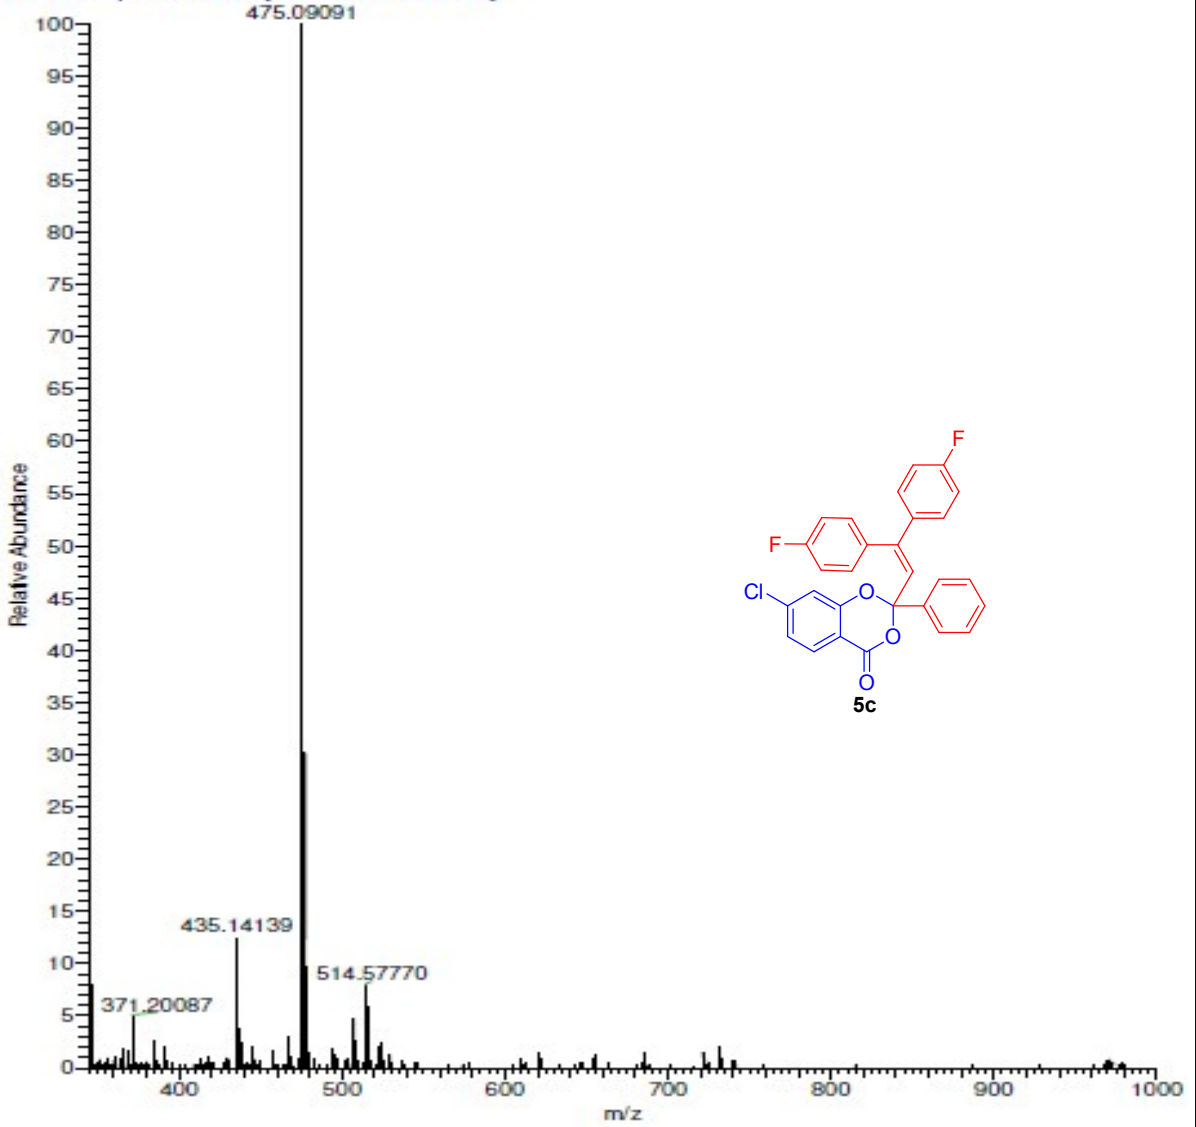

T: FTMS + p ESI Full ms [100.0000-1000.0000]

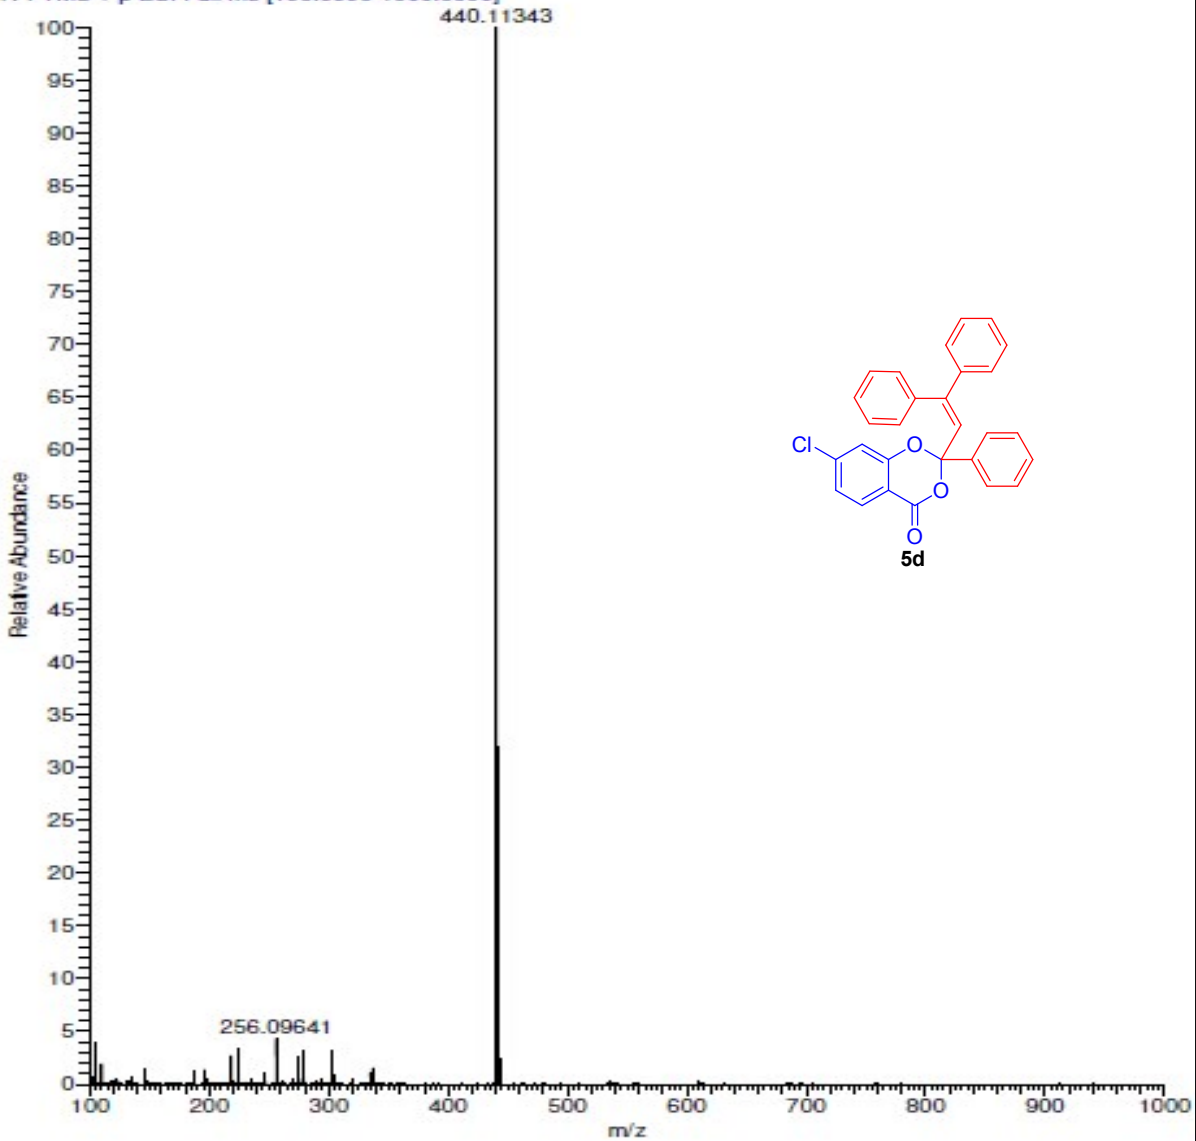

MMV-628 #43 RT: 0.46 AV: 1 NL: 6.98E7  
T: FTMS + p ESI Full ms [100.0000-1000.0000]

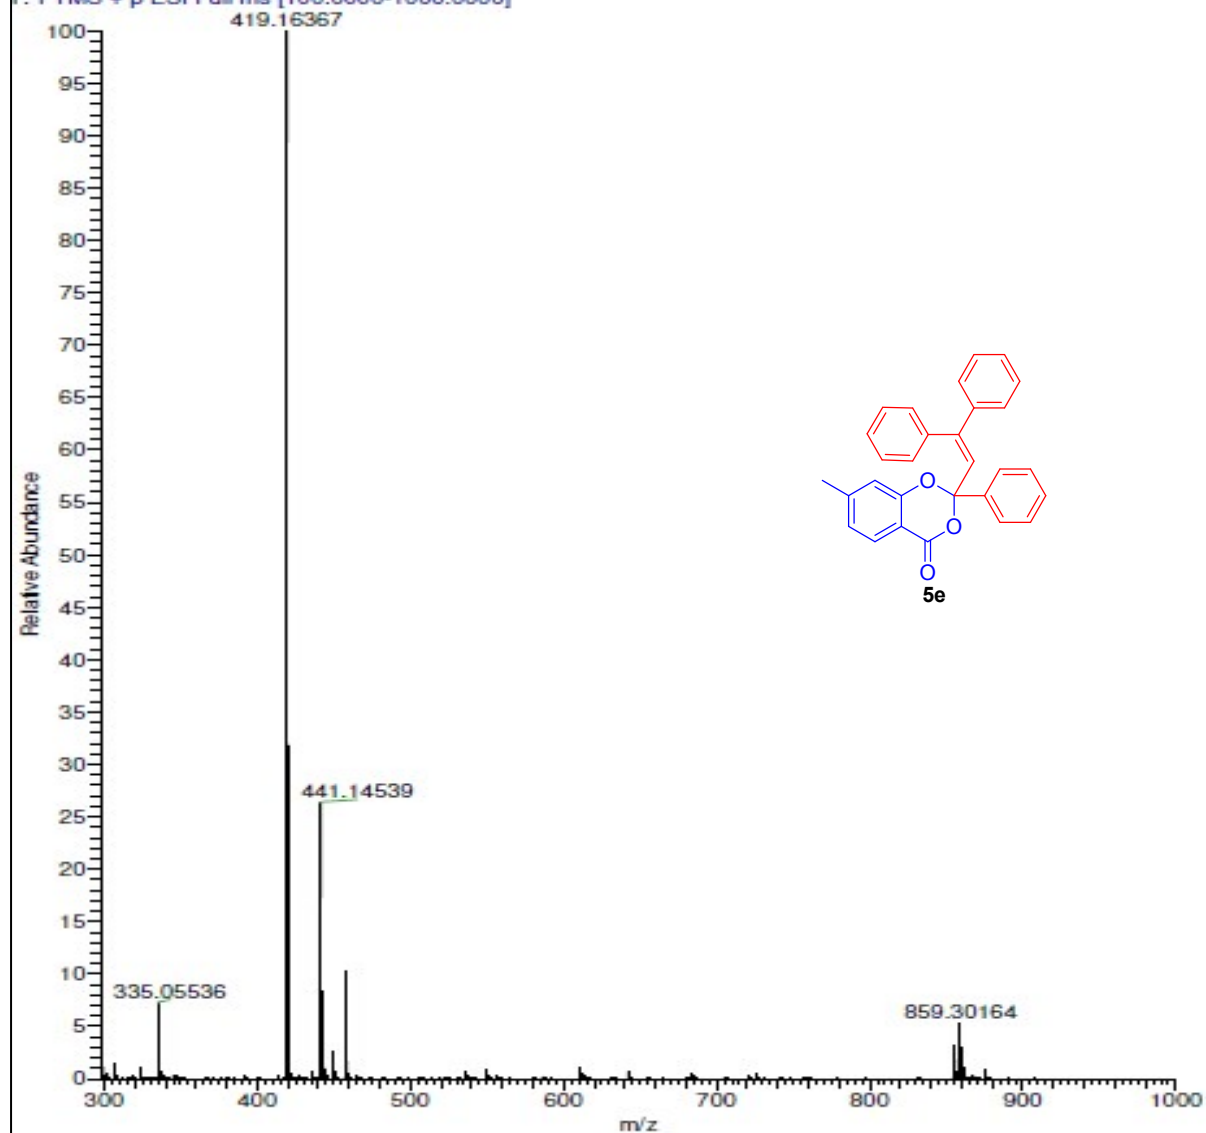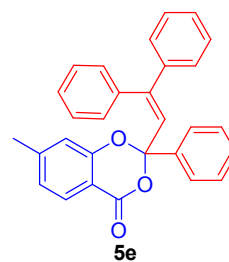



MMV-635\_20201124133302 #49 RT: 0.52 AV: 1 NL: 9.44E5  
T: FTMS + p ESI Full ms [100.0000-1000.0000]

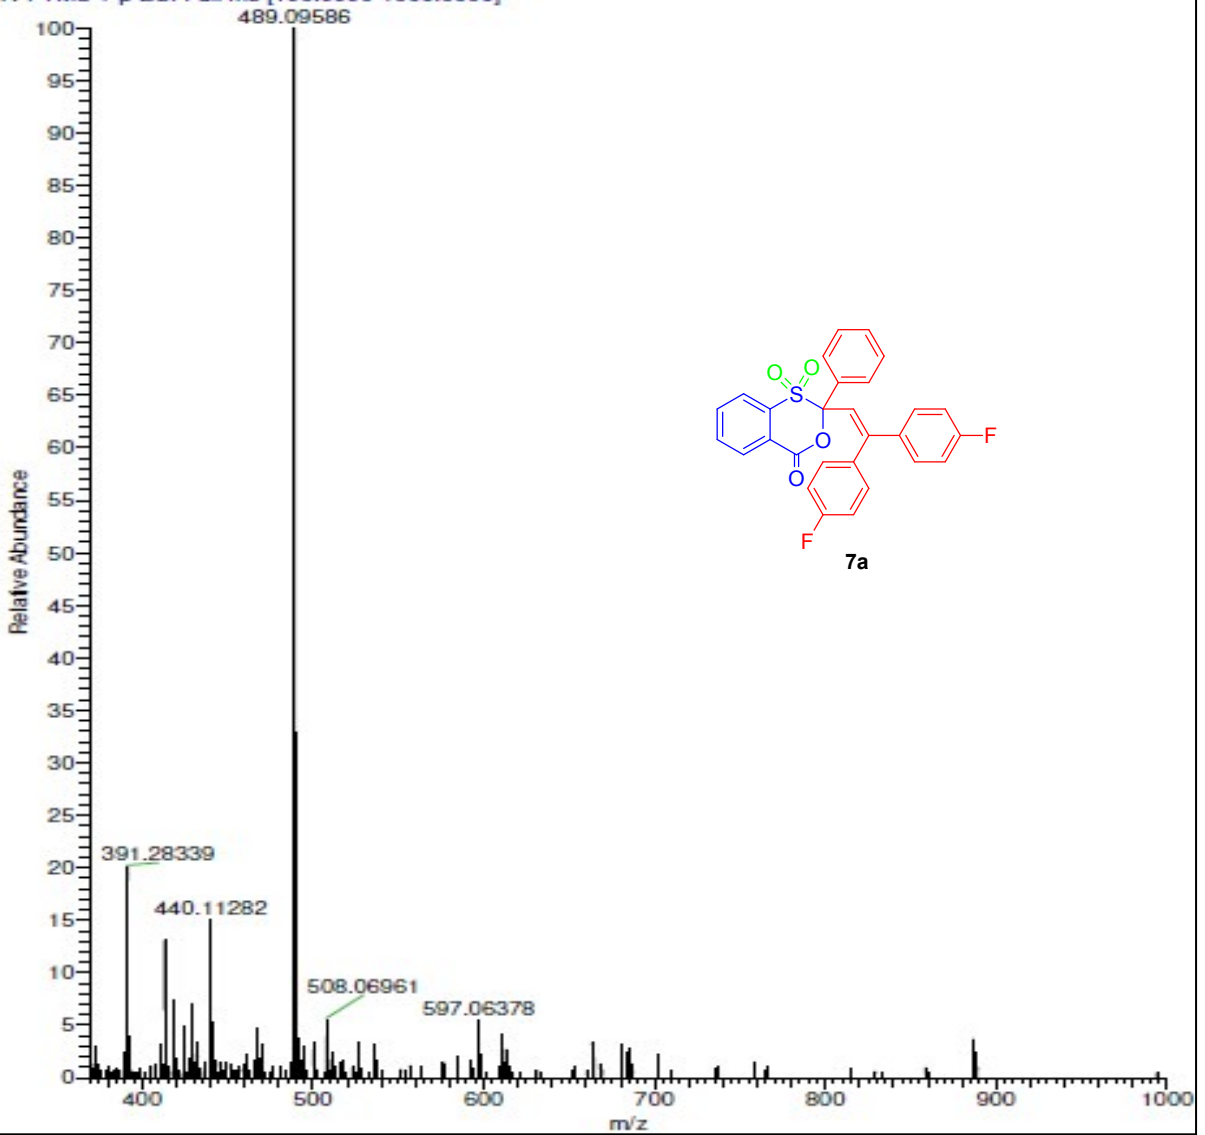

Supplement: d0ob02543g2.pdf [file d0ob02543g2.pdf]
